# Supplementary material for: A Population Genetics Pedigree Perspective on the Transmission of Helicobacter pylori
Source: Oxford University Press journal article supplement (doi:10.1534/genetics.106.057703), 2006-10-23
Supplement: delportetal_supptable1.pdf [file delportetal_supptable1.pdf]

**Supplementary Table 1:** Pedigree and sample population statistics. In each case the pedigree family number, corresponding to Supplementary Figure 1, is provided along with the household number, number of individuals in household (n), the proportion of males in the household, mean age and standard deviation of members of the household, and the proportion of individuals of the household that are permanent residents (Resident), have accesses the reticulated water supply (Reticulated water), have access to flushing toilets (Plumbing), and have access to their own toothbrush (Toothbrush).

| Family | Household | n   | Sex ratio | Mean Age (sd) | Resident | Reticulated Water | Plumbing | Toothbrush |
|--------|-----------|-----|-----------|---------------|----------|-------------------|----------|------------|
| 12-1   | 29        | 7   | 0.57      | 32 (29)       | 1.00     | 1.00              | 1.00     | 1.00       |
|        | 35        | 1   | 1.0       | 33            | 0.00     | 1.00              | 1.00     | 1.00       |
|        | 155       | 3   | 0.0       | 25 (21)       | 1.00     | 1.00              | 1.00     | 1.00       |
|        | 222       | 4   | 0.5       | 31 (29)       | 0.67     | 1.00              | 1.00     | 1.00       |
|        | 223       | 5   | 0.6       | 22 (16)       | 1.00     | 1.00              | 0.00     | 1.00       |
|        | 225       | 4   | 0.75      | 26 (25)       | 1.00     | 1.00              | 1.00     | 1.00       |
| 12-2   | 167       | 5   | 1.00      | 44 (41)       | 1.00     | 1.00              | 1.00     | 1.00       |
|        | 169       | 3   | 0.33      | 26 (18)       | 1.00     | 1.00              | 1.00     | 1.00       |
| 12-3   | 45        | 4   | 0.5       | 31 (23)       | 1.00     | 1.00              | 1.00     | 1.00       |
|        | 194       | 2   | 0.0       | 33 (23)       | 1.00     | 1.00              | 1.00     | 1.00       |
| 12-4   | 211       | 6   | 0.33      | 25 (20)       | 1.00     | 1.00              | 1.00     | 1.00       |
| 13     | 34        | 3   | 0.33      | 18 (14)       | 1.00     | 1.00              | 1.00     | 1.00       |
|        | 35        | 7   | 0.43      | 38 (25)       | 1.00     | 1.00              | 1.00     | 1.00       |
|        | 220       | 4   | 0.5       | 31 (29)       | 1.00     | 1.00              | 1.00     | 1.00       |
| 21     | 8         | 7   | 0.43      | 21 (14)       | 1.00     | 1.00              | 1.00     | 0.86       |
| 39     | 107       | 6   | 0.33      | 13 (14)       | 1.00     | 1.00              | 1.00     | 0.84       |
|        | 231       | 3   | 0.33      | 20 (21)       | 1.00     | 1.00              | 1.00     | 1.00       |
| 48     | 188       | 6   | 0.17      | 11 (12)       | 1.00     | 1.00              | 1.00     | 1.00       |
|        | 124       | 3   | 0.33      | 21 (15)       | 1.00     | 1.00              | 1.00     | 1.00       |
| 49     | 73        | 7   | 0.29      | 16 (13)       | 1.00     | 1.00              | 1.00     | 1.00       |
| 50     | 178       | 6   | 0.17      | 30 (25)       | 1.00     | 1.00              | 1.00     | 1.00       |
| 51     | 200       | 4   | 0.25      | 27 (23)       | 1.00     | 1.00              | 0.00     | 1.00       |
| 52     | 205       | 5   | 0.20      | 18 (19)       | 1.00     | 1.00              | 0.00     | 1.00       |
| All    |           | 105 | 0.33      | 25 (21)       | 0.98     | 1.00              | 0.87     | 0.98       |
